# Supplementary material for: Coupled electrophysiological recording and single cell transcriptome analyses revealed molecular mechanisms underlying neuronal maturation
Source: PubMed Central journal article supplement (PMC4791425; doi:10.1007/s13238-016-0247-8), 2016-02-16
Supplement: 13238_2016_247_MOESM2_ESM.pdf [file 13238_2016_247_MOESM2_ESM.pdf]

### Representative AP Traces in 19 Cells

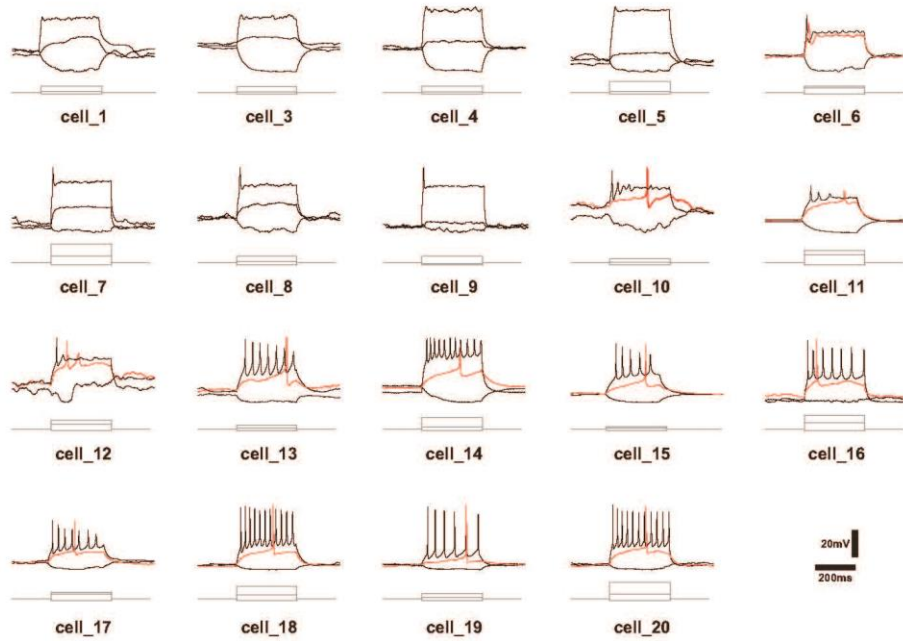

## Supplementary Figure 1

**Supplement Fig 1.** Representative action potential responses of 19 studied human neurons evoked by current injection (Bars: 200 ms, 20 mv). The red trace represents the AP responses when the initial spike appeared during the injection.

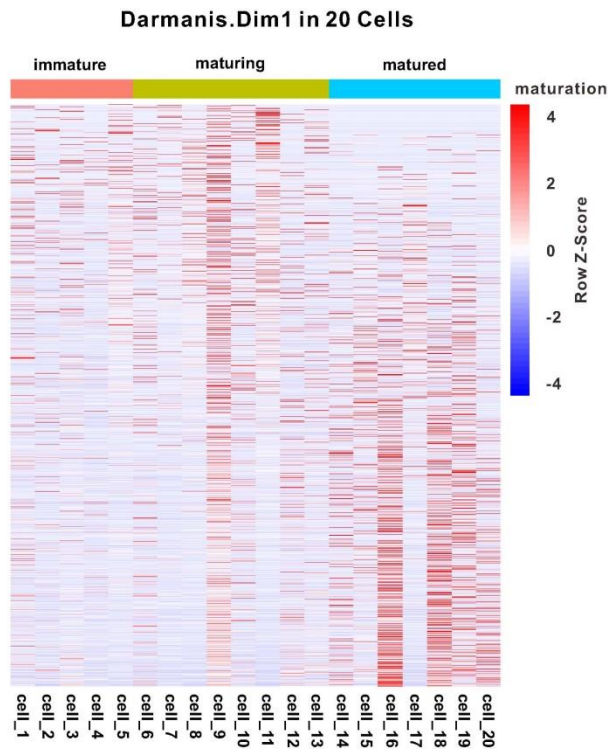

## Supplementary Figure 2

**Supplement Fig 2.** Heatmap of the expression of 1479 genes significantly associated with dimension 1 published by Darmanis et al in 20 studied cultured human neurons.

**Supplement table 1.** The 9 parameters of electrophysiological properties of human neurons
